# Supplementary material for: Rho-ROCK liberates sequestered claudin for rapid de novo tight junction formation
Source: eLife journal article supplement (doi:10.7554/elife.102794), 2024-11-22

# Figure2C

anti-claudin-1

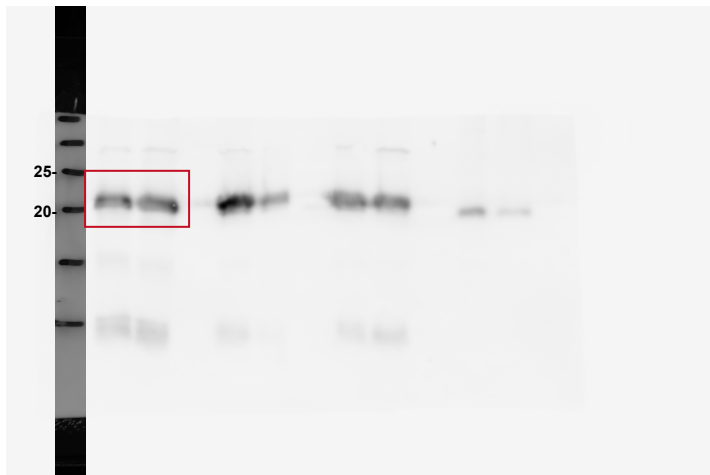

anti- $\alpha$ -tubulin

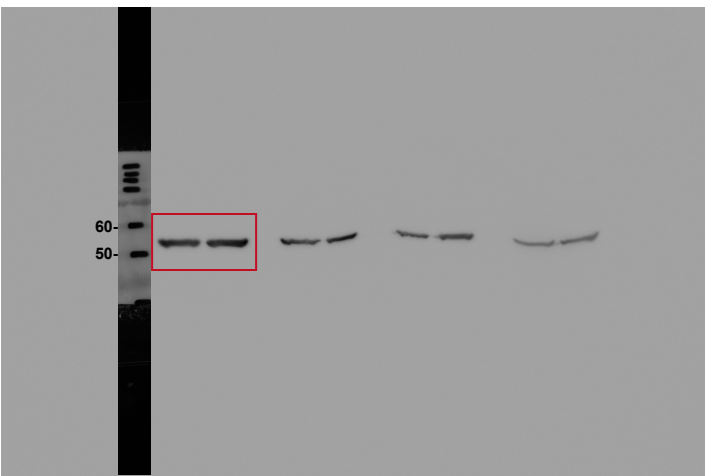

Supplement: fig2-data2 [file elife-102794-fig2-data2-v1.pdf]
