# Supplementary material for: Rho-ROCK liberates sequestered claudin for rapid de novo tight junction formation
Source: eLife journal article supplement (doi:10.7554/elife.102794), 2024-11-22

# Figure7A

anti-Matriptase (M69)

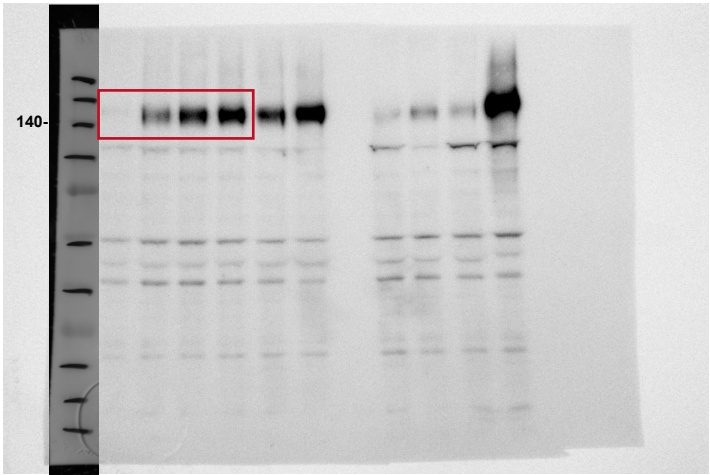

anti-Matriptase (M24)

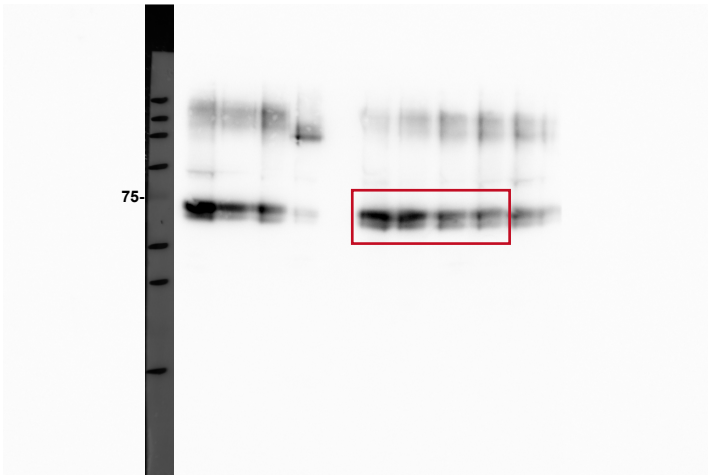

anti-TROP2

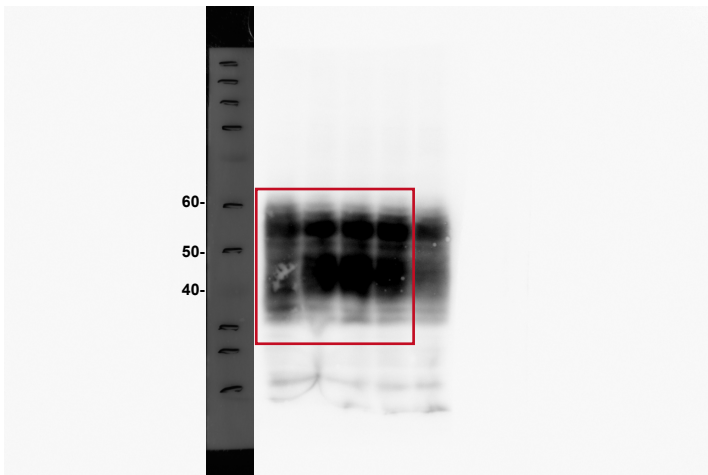

Supplement: fig7-data2 [file elife-102794-fig7-data2-v1.pdf]
